CORRECTION

# Correction: Fine-Grained Distribution of a Non-Native Resource Can Alter the Population Dynamics of a Native Consumer

Mifuyu Nakajima, Carol L. Boggs

Figs [2](#), [3](#), [4](#) and [5](#) are incorrect. The figures are out of order and associated with the wrong legend. The authors have provided corrected versions here.

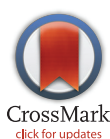

## OPEN ACCESS

**Citation:** Nakajima M, Boggs CL (2015) Correction: Fine-Grained Distribution of a Non-Native Resource Can Alter the Population Dynamics of a Native Consumer. PLoS ONE 10(12): e0145874. doi:10.1371/journal.pone.0145874

**Published:** December 21, 2015

**Copyright:** © 2015 Nakajima, Boggs. This is an open access article distributed under the terms of the [Creative Commons Attribution License](#), which permits unrestricted use, distribution, and reproduction in any medium, provided the original author and source are credited.

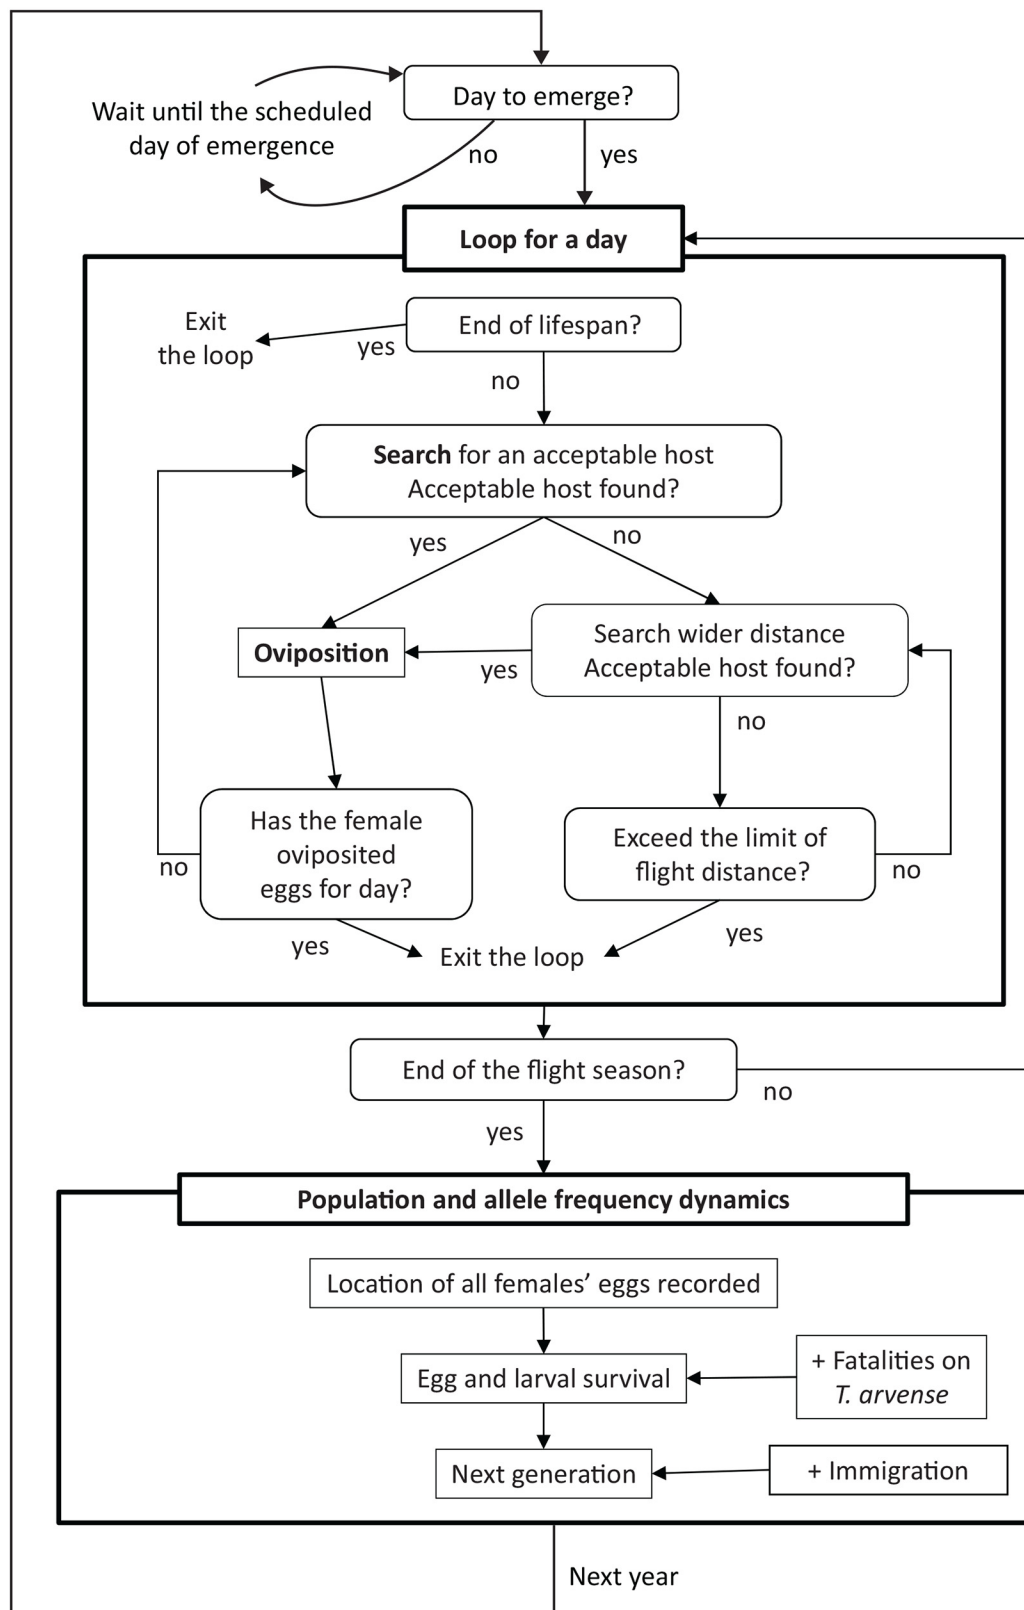

**Fig 2. Simulation flow chart for the IBM.**

doi:10.1371/journal.pone.0145874.g001

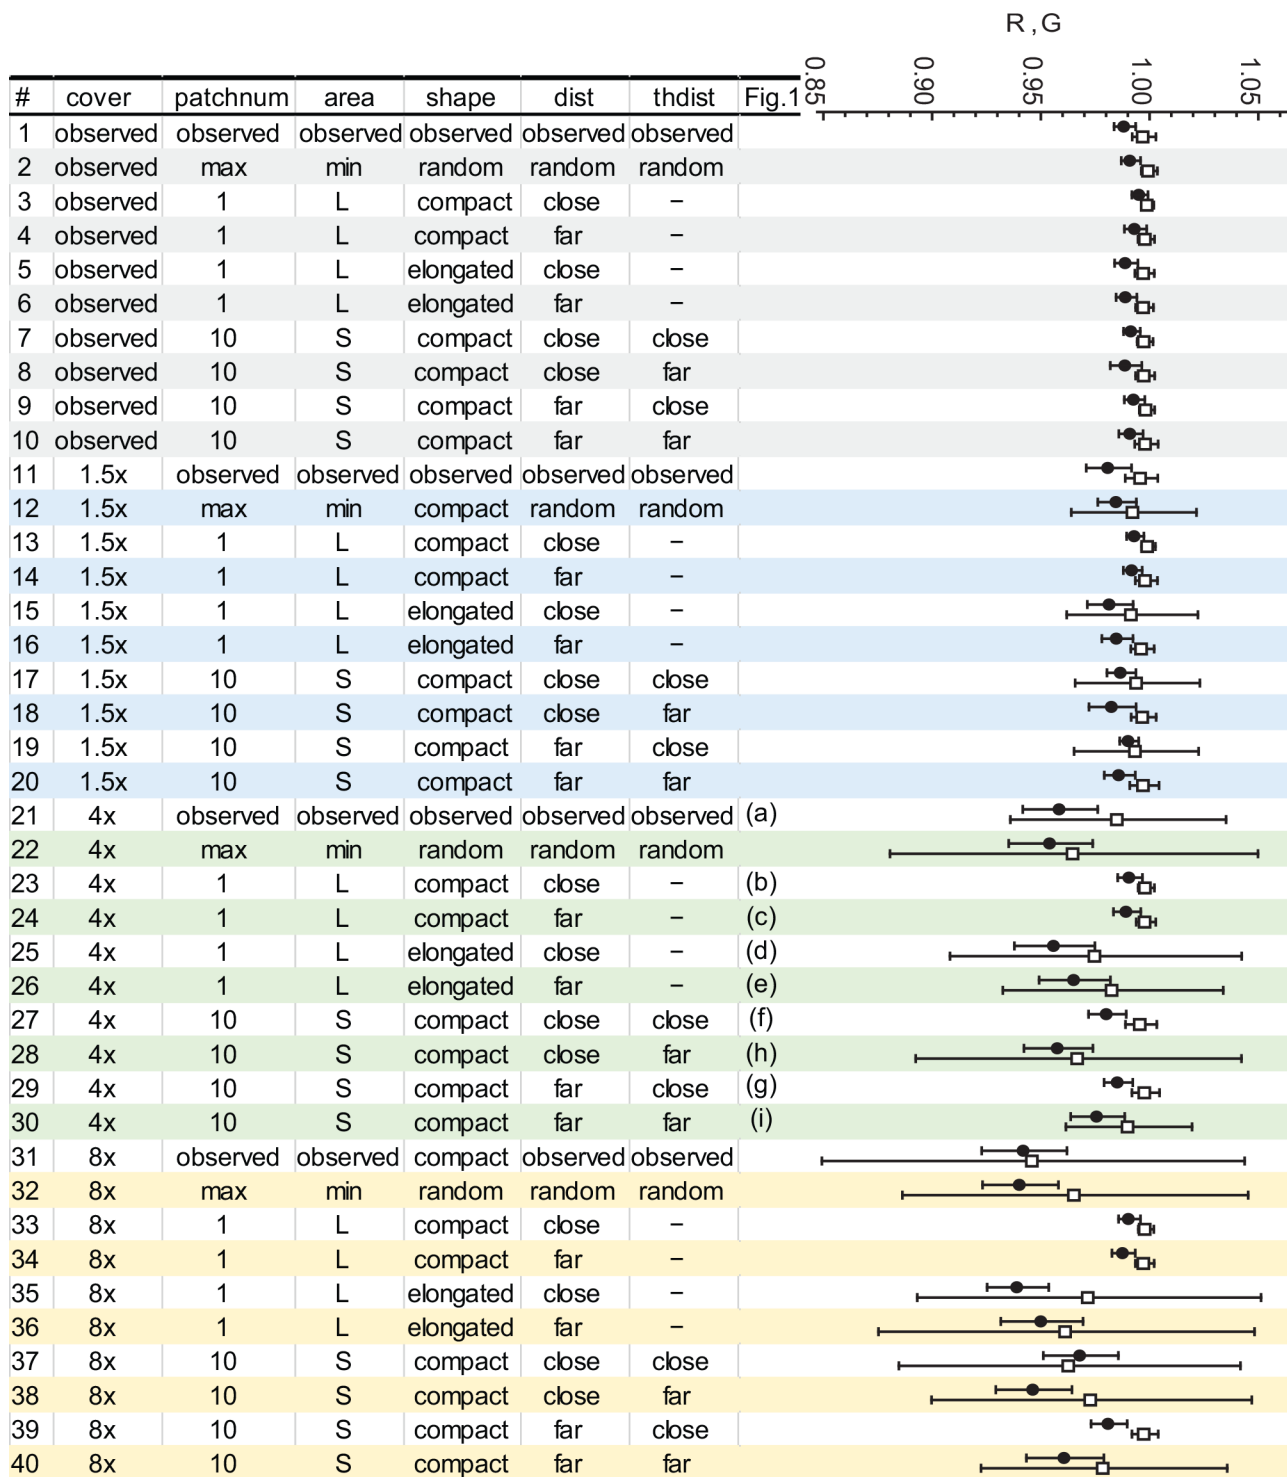

**Fig 3. Spatial patterns of *Thlaspi arvense* simulated by the IBM (left) and the population growth rate *R* and the rate of allele frequency change *G* of each simulation, shown in closed circle and open square, respectively (right).** The right-end column of the table shows the corresponding panel in Fig 1.

doi:10.1371/journal.pone.0145874.g002

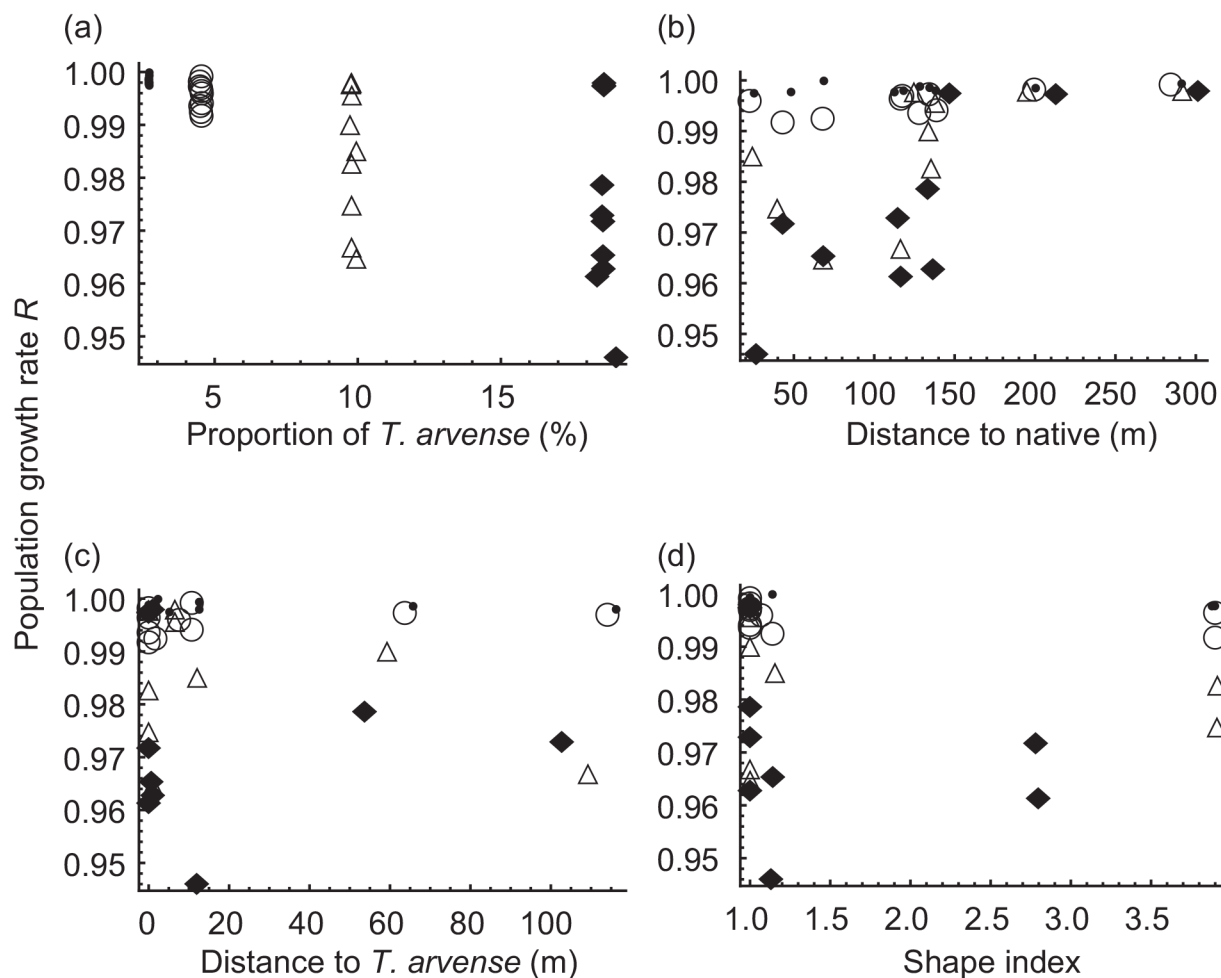

**Fig 4. Change of butterfly population growth rate with 4 spatial attributes of *T. arvensis* distribution that significantly affected butterfly population dynamics: “cover” (a), “dist” (b), “thdist” (c) and “shape” (d).** Symbols represent different levels of “cover”, i.e., the proportion of habitat occupied by *T. arvensis* to the total habitat occupied by the host plants; closed circle: <3%, open circle: <5%, triangle: <10%, diamond: <20%.

doi:10.1371/journal.pone.0145874.g003

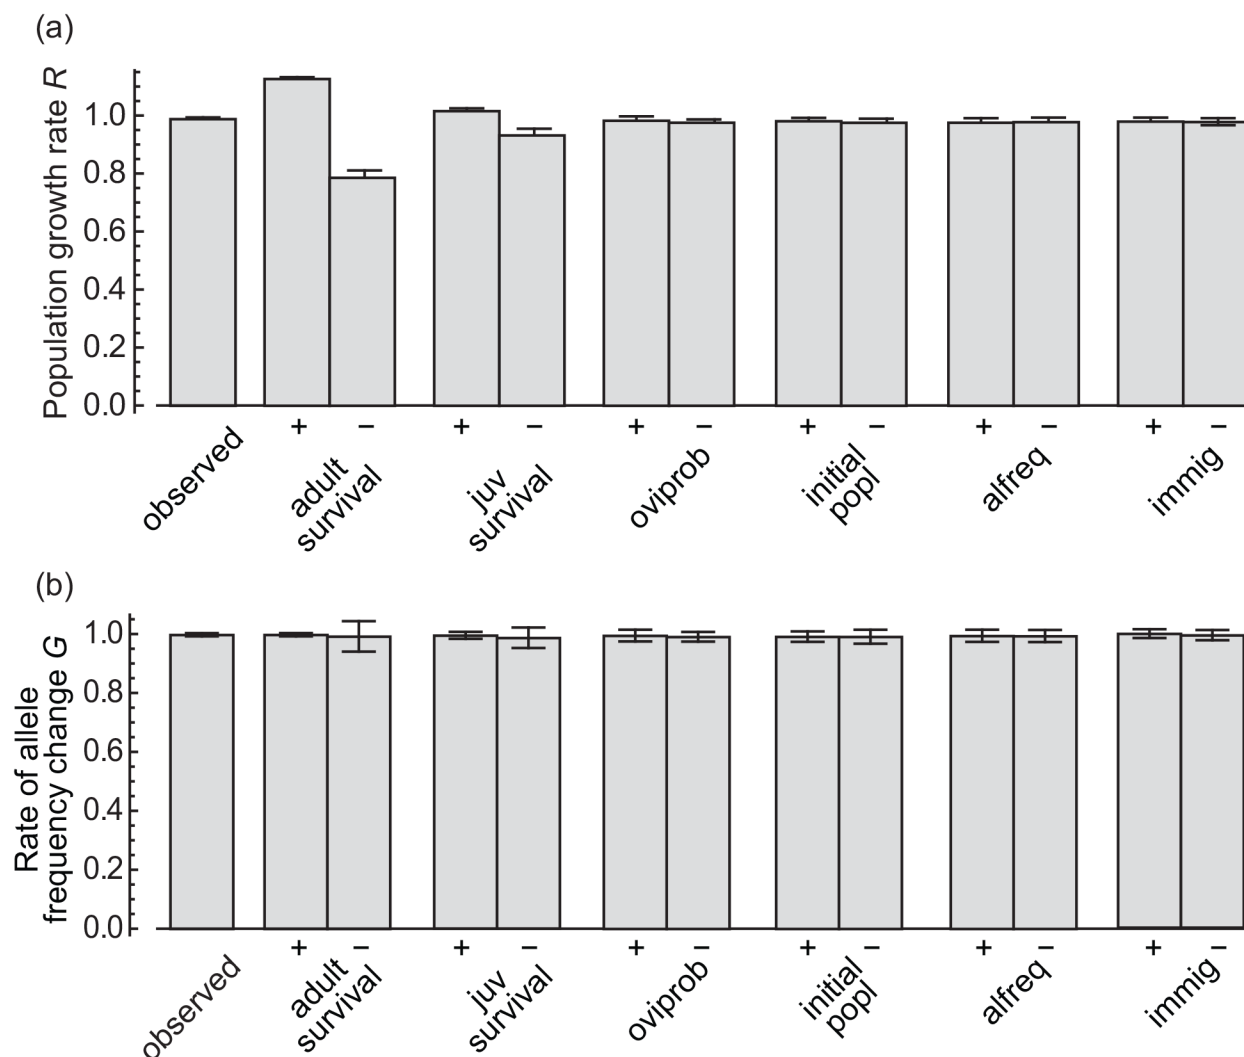

**Fig 5. Results of the sensitivity analysis.** Bars show the (a) mean population growth rate and (b) mean rate of allele frequency change of simulations with each of the following parameters increased or decreased by 3% (indicated by "+" and "-", respectively) from the observed value shown in Table 1; "observed": no parameters were changed; "immig": immigration rate; "oviprob": oviposition probability; "alfreq": initial allele frequency; "juvsurvival": survival until adult; "lifespan": lifespan of adult females; "initial popl": initial population size. The parameters are shown in the order of largest to smallest difference between the means of "+" and "-" except for "observed". Error bars show SD.

doi:10.1371/journal.pone.0145874.g004

## Reference

1. Nakajima M, Boggs CL (2015) Fine-Grained Distribution of a Non-Native Resource Can Alter the Population Dynamics of a Native Consumer. PLoS ONE 10(11): e0143052. doi:10.1371/journal.pone.0143052 PMID: 26575843
